# Supplementary material
Source: PubMed Central journal article supplement (PMC8810763)
Supplement: 41377_2022_722_MOESM1_ESM.pdf [file 41377_2022_722_MOESM1_ESM.pdf]

Supplementary Information for the manuscript:

**First Chinese ultraviolet–visible hyperspectral satellite  
instrument implicating global air quality during the  
COVID-19 pandemic in early 2020**

Cheng Liu<sup>1,2,3,4</sup>, Qihou Hu<sup>2,\*</sup>, Chengxin Zhang<sup>1</sup>, Congzi Xia<sup>5</sup>, Hao Yin<sup>2</sup>, Wenjing Su<sup>6</sup>,  
Xiaohan Wang<sup>1</sup>, Yizhou Xu<sup>1</sup>, Zhiguo Zhang<sup>1</sup>

<sup>1</sup> Department of Precision Machinery and Precision Instrumentation, University of Science and Technology of China, Hefei 230026, China;

<sup>2</sup> Key Laboratory of Environmental Optics and Technology, Anhui Institute of Optics and Fine Mechanics, Hefei Institutes of Physical Science, Chinese Academy of Sciences, Hefei, 230031, China

<sup>3</sup> Center for Excellence in Regional Atmospheric Environment, Institute of Urban Environment, Chinese Academy of Sciences, Xiamen 361021, China

<sup>4</sup> Key Laboratory of Precision Scientific Instrumentation of Anhui Higher Education Institutes, University of Science and Technology of China, Hefei 230026, China

<sup>5</sup> School of Earth and Space Sciences, University of Science and Technology of China, Hefei 230026, China

<sup>6</sup> Department of Environmental Science and Engineering, University of Science and Technology of China, Hefei 230026, China

\*Corresponding author. E-mail: qhhu@aiofm.ac.cn.

To complement the information provided in the main manuscript, the following sections provide supporting information (Figures S1-S7).

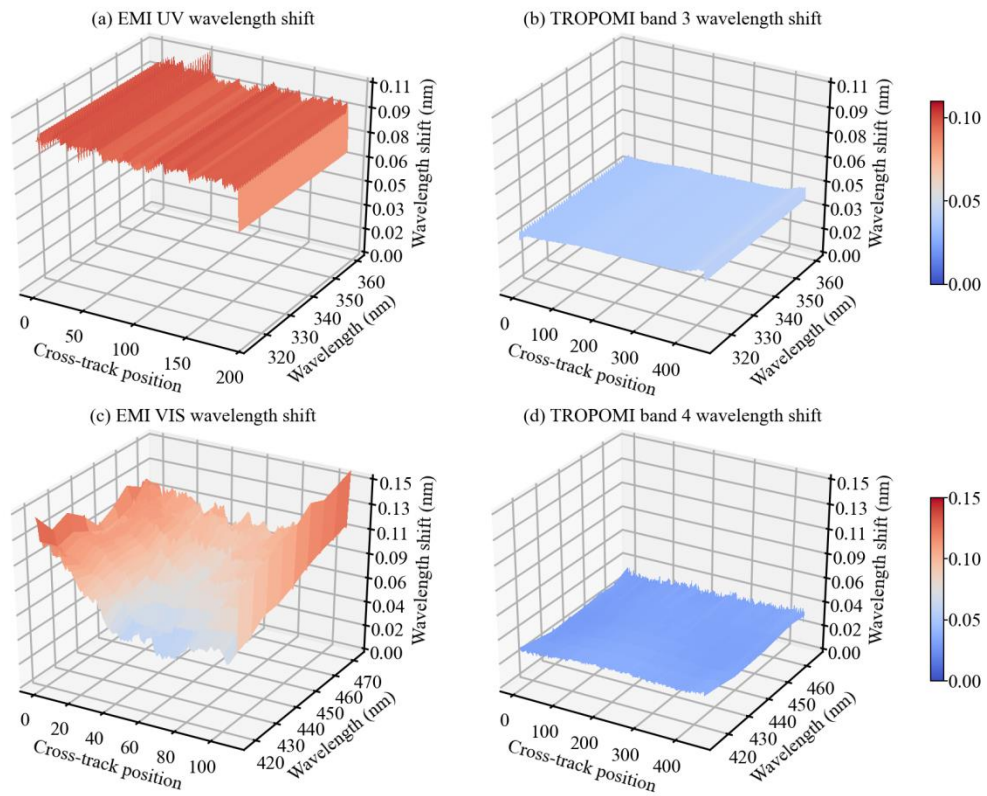

Figure S1. Same as Figure 1, but for the comparison of wavelength shift.

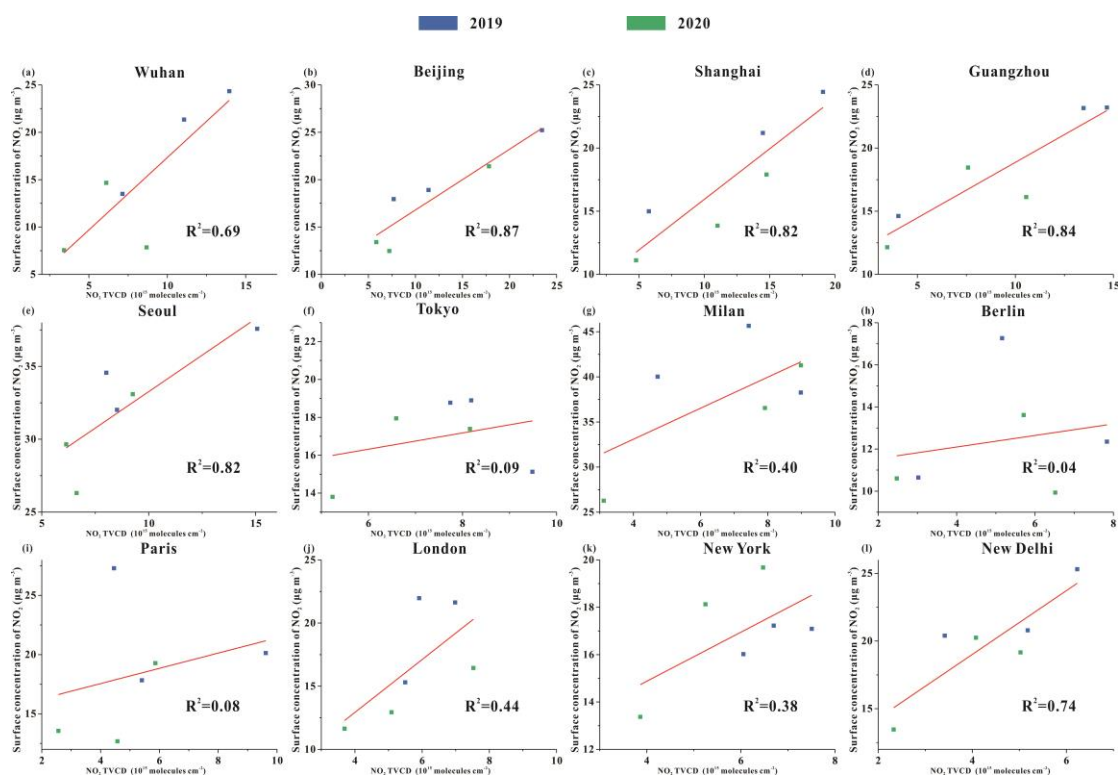

Figure S2. Comparison of the monthly  $\text{NO}_2$  TVCDs from EMI and the surface concentrations of  $\text{NO}_2$  in (a) Wuhan, (b) Beijing, (c) Shanghai, (d) Guangzhou, (e) Seoul, (f) Tokyo, (g) Milan, (h) Berlin, (i) Paris, (j) London, (k) New York and (l) New Delhi. The blue squares indicate the data in 2019 and the green squares indicate the data in 2020. The surface  $\text{NO}_2$  concentrations were obtained from the *World Air Quality Index* (<https://aqicn.org/here/>). No available insitu  $\text{NO}_2$  data was found for Rio de Janeiro.

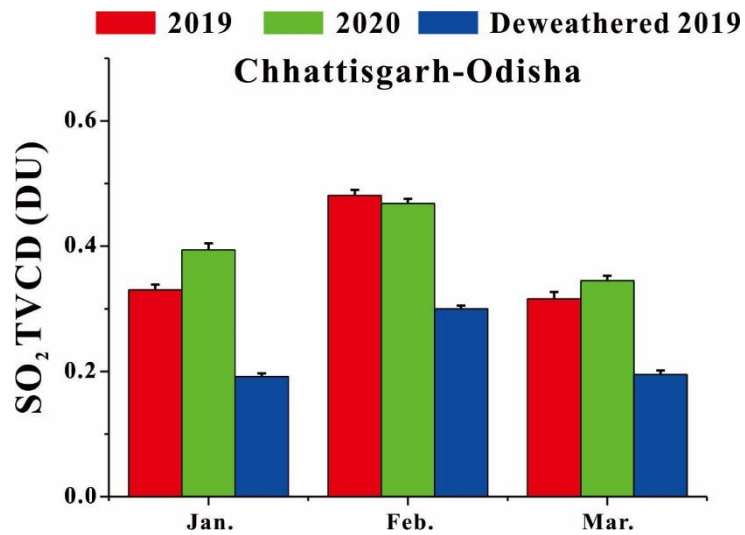

Figure S3. Similar to Figure 5, but for  $\text{SO}_2$  in the Chhattisgarh-Odisha region in India.

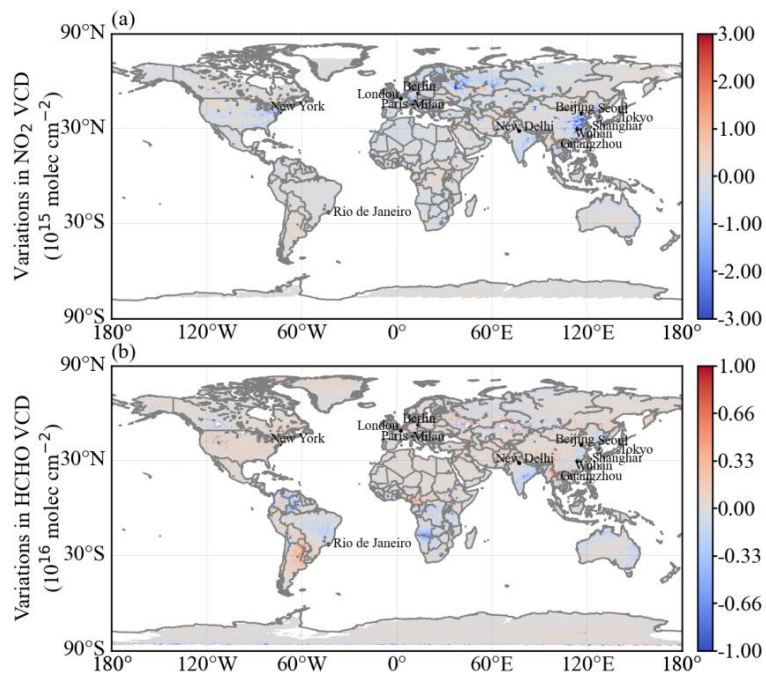

Figure S4. Similar to Figure 4, but the  $\text{NO}_2$  and HCHO TVCDs data were taken from TROPOMI observations.

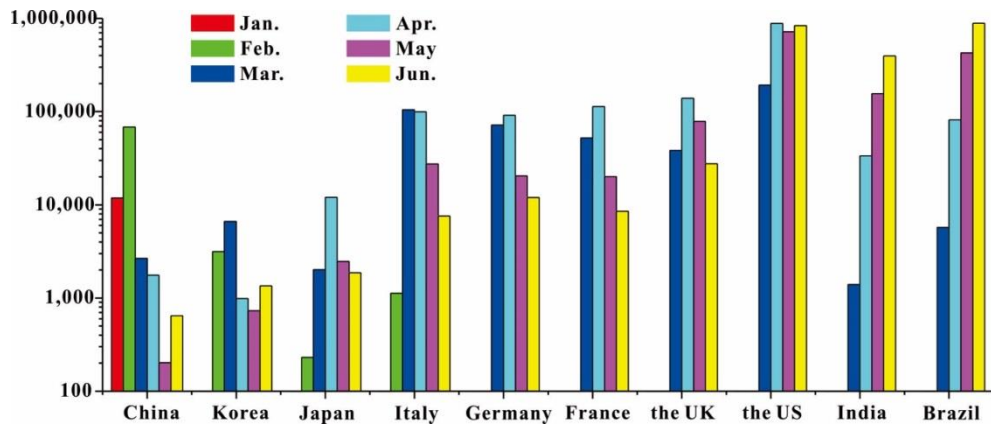

Figure S5. Monthly increase in infections of COVID-19 for the ten investigated countries.

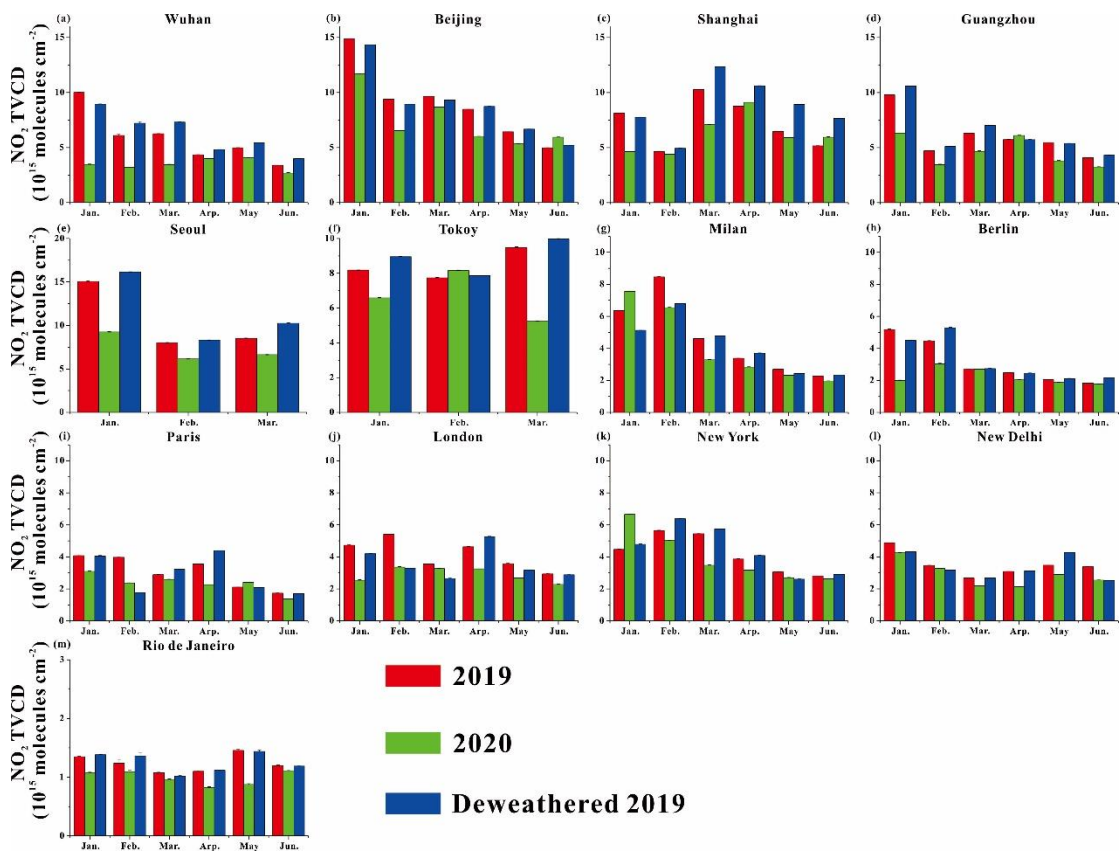

Figure S6. Similar to Figure 5, but the NO<sub>2</sub> TVCD data was from TROPOMI observations.

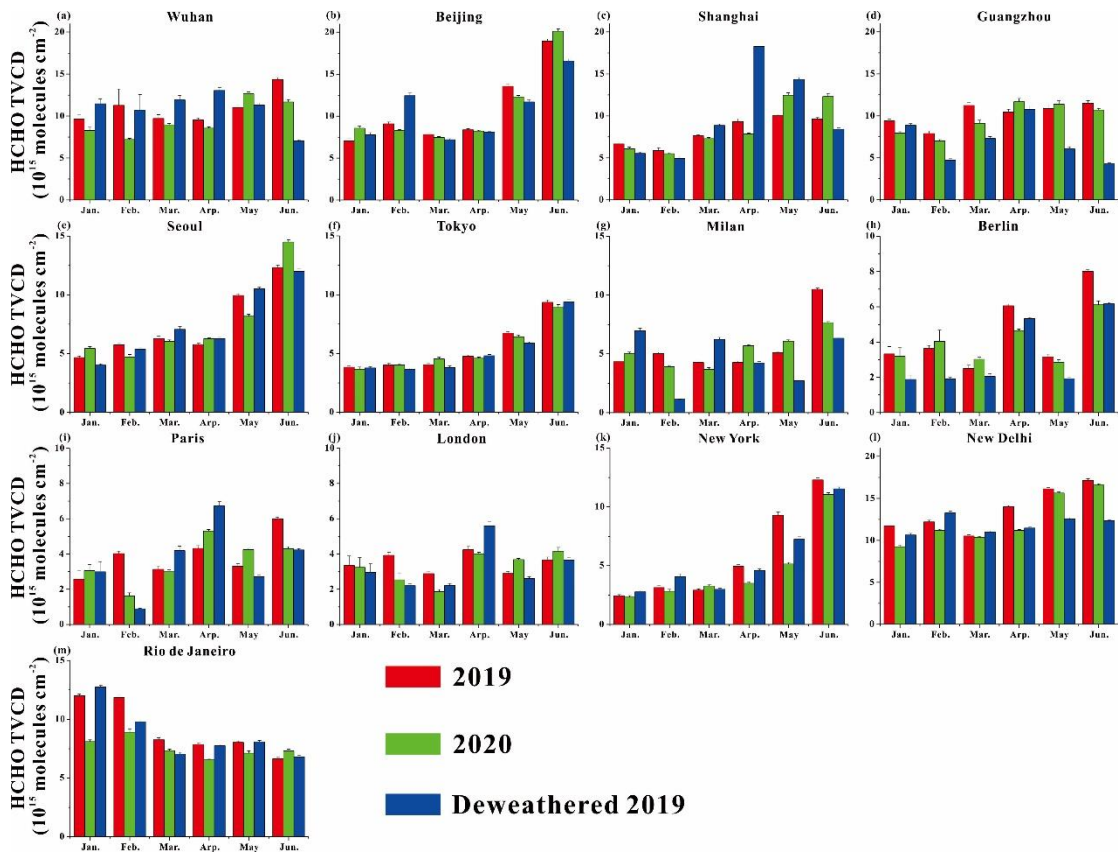

Figure S7. Similar to Figure 6, but the HCHO TVCD data was from TROPOMI observations.
